# Supplementary material
Source: publisher site journal article supplement (https://www.dovepress.com/article/323084)
Supplement: Supplementary file 1 [file get_supplementary_file.php]

# Population-based Epidemiologic Study in Venous Diseases in Germany - Prevalence, Comorbidity, and Medical Needs in a Cohort of 19,104 Workers

## Supplement

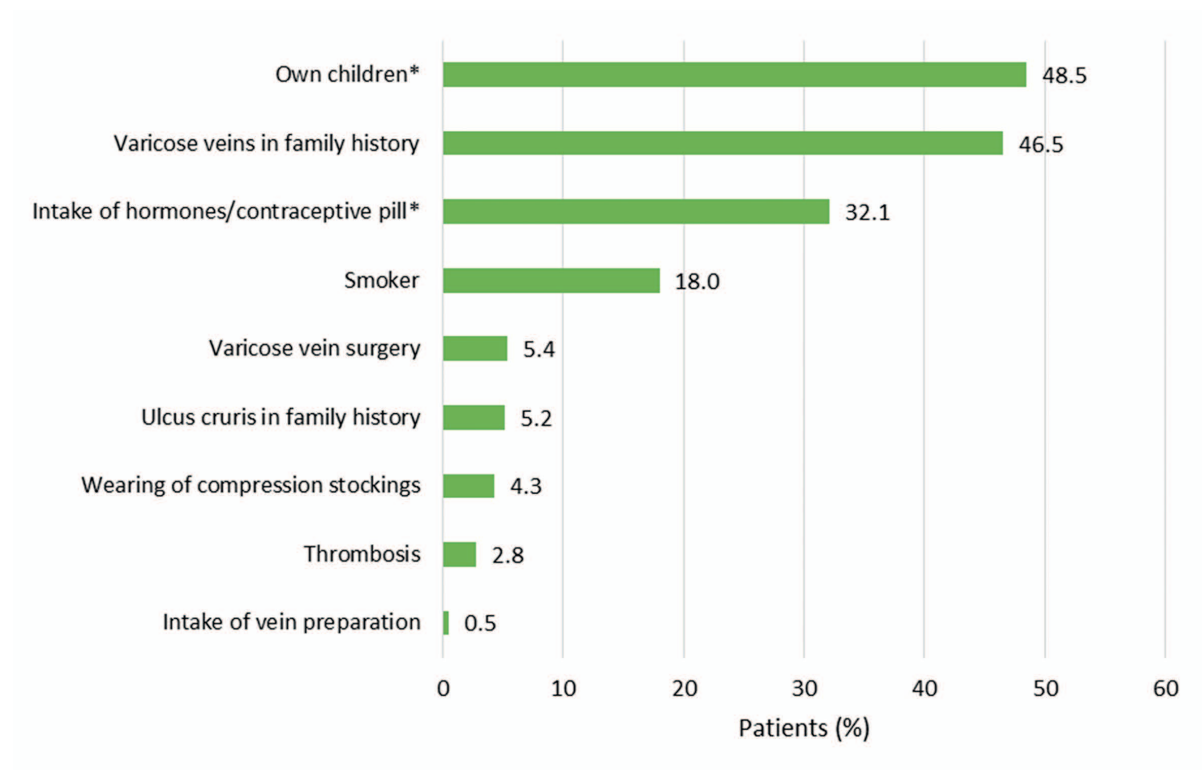

**Figure S1** Personal history (n = 10,514)

\*only women (n = 4,053)
